# Supplementary material for: Pharmacokinetics‐Pharmacodynamics of High‐Dose Ivermectin with Dihydroartemisinin‐Piperaquine on Mosquitocidal Activity and QT‐Prolongation (IVERMAL)
Source: PubMed Central journal article supplement — Clin Pharmacol Ther. 2018 Oct 9;105(2):388–401. doi: 10.1002/cpt.1219 (PMC6585895; doi:10.1002/cpt.1219), 2018-10-09
Supplement: CPT-105-388-s002.pdf [file CPT-105-388-s002.pdf]

# Supplementary Material

Smit MR, Ochomo EO, Waterhouse D, et al. **Pharmacokinetics-Pharmacodynamics of High-Dose Ivermectin with Dihydroartemisinin-Piperaquine on Mosquitocidal Activity and QT-prolongation (IVERMAL)**. *Clinical Pharmacology & Therapeutics* 2018. <http://doi.org/10.1002/cpt.1219>

## Contents

|                                                                                                                                                                                      |    |
|--------------------------------------------------------------------------------------------------------------------------------------------------------------------------------------|----|
| Supplementary Texts .....                                                                                                                                                            | 2  |
| Text S1: Methods for drug analytical quantification of ivermectin and piperaquine .....                                                                                              | 2  |
| Text S2: Supplementary equations.....                                                                                                                                                | 3  |
| Text S3: IVERMAL dose-response calculator .....                                                                                                                                      | 5  |
| Supplementary Figures .....                                                                                                                                                          | 6  |
| Figure S1: Flowchart of pharmacokinetic model applied separately to both ivermectin and piperaquine.....                                                                             | 6  |
| Figure S2: Capillary vs. venous concentration ratios for ivermectin and piperaquine.....                                                                                             | 7  |
| Figure S3: Ivermectin vs. mosquito mortality (%) dose-response curves (LC <sub>50</sub> method) .....                                                                                | 8  |
| Figure S4: Residual analysis of mosquito mortality rates (i.e., ivermectin's pharmacodynamic effect) over time, as predicted by the simultaneous PK/PD model vs. observed data ..... | 9  |
| Figure S5: Piperaquine vs. QTcF dose-response curves .....                                                                                                                           | 10 |
| Supplementary Tables .....                                                                                                                                                           | 11 |
| Table S1: Compartmental model fits for ivermectin and piperaquine.....                                                                                                               | 11 |
| Table S2: Number of observed concentrations and outcomes (ivermectin and piperaquine).....                                                                                           | 12 |
| Table S3: Ivermectin LC <sub>50</sub> values by assay duration, and vs. previous studies .....                                                                                       | 13 |
| Table S4: Piperaquine concentration and QTcF interval (observed data).....                                                                                                           | 14 |
| Table S5: Piperaquine concentration and QTcF interval (population fitted data) .....                                                                                                 | 14 |
| Table S6: Spearman's correlations (ivermectin and piperaquine) .....                                                                                                                 | 15 |

## Supplementary Texts

### Text S1: Methods for drug analytical quantification of ivermectin and piperazine

#### Ivermectin Assay (LC-MS/MS):

Plasma samples were taken out of the -80°C freezer and allowed to come to room temperature. A 60 µL aliquot of each sample was assayed alongside plasma calibration curve standards (5-320 ng/mL) and quality control samples (low 15 ng/mL, medium 150 ng/mL and high 250 ng/mL). A 60 µL aliquot of each plasma sample was taken and placed into 1.5 ml Eppendorf tubes. 940 µL of acetonitrile containing doramectin 100 ng/ml was added as internal standard (IS). Samples were then mixed on a vortexer for 10 seconds and subsequently left to settle for 5 minutes. Following, the samples were centrifuged for 10 minutes at 14,000 rpm. The resulting supernatants were then taken and placed into clean and dry 10 mL glass test-tubes containing 1 ml of water. 3 mL of a 1/1/1 mix of dichloromethane/hexane/methyl-tert-butyl ether mix was added, which was subsequently vortexed for 10 seconds, followed by a 10-minute centrifugation at 4,000 rpm. The resultant supernatants were then removed and placed into clean and dry 7 mL glass test-tubes before being evaporated until dry using a gentle stream of nitrogen free air at 30°C. The dried down supernatants were then reconstituted in 60 µL of mobile phase and then vortexed for 10 seconds. The reconstituted samples were then transferred to clean glass insert vials and then centrifuged at 4,700 rpm for 5 minutes. Samples were then injected (20 µL) onto 100 x 2.1 mm, 1.9 (µm) particle size, Hypersil GOLD (Thermo Scientific) column using an isocratic gradient method of acetonitrile/0.1% formic acid (90/10) at a flowrate of 400 µL/min with a column oven set at 30°C. For the analysis and quantification of ivermectin from capillary plasma samples the above procedure was revalidated using a 30 µL aliquot of capillary plasma. The extraction procedure, calibration curve standards, quality control levels were kept the same except for the lower limit of quantification (LLOQ) which was changed from 5 ng/mL to 10 ng/mL. The method was then revalidated for the reduced aliquot of capillary plasma.

#### Piperazine Assay (LC-MS/MS):

Plasma samples were taken out of the -80°C freezer and allowed to come to room temperature. A 10 µL aliquot of each sample was assayed alongside plasma calibration curve standards (1.5-600 ng/mL) and quality control samples (low 4.5 ng/mL, medium 250 ng/mL and high 500 ng/mL). Using a 96-well filter plate, 300 µL of a perception solution (80/20 acetonitrile/methanol) was added to each well, containing 10 ng/ml piperazine-d6 as internal standard (IS). A 10 µL aliquot of each plasma sample was then added to a corresponding well. The filter plate containing the IS and plasma samples was then transferred to a 96-well vacuum manifold. A corresponding 96-well plate was then placed inside the vacuum manifold to catch the subsequent filtrate after the vacuum had been applied. The resultant filtrate was then evaporated until dry using a gentle stream of nitrogen free air at 30°C. The dried down supernatants were then reconstituted in 60 µL of mobile phase and then vortexed for 10 seconds. The reconstituted samples were then transferred to clean glass insert vials, followed by centrifuging at 4,700 rpm for 5 minutes. Samples were subsequently injected (20 µL) onto 50 x 2 mm, 3 (µm) particle size, Gemini (Phenomenex) column using an isocratic gradient of acetonitrile/2.5 mM ammonium bicarbonate (pH 7) (85/15) at a flowrate of 500 µL/min with a column oven set at 30°C. The capillary plasma samples were analysed and quantified using the exact same method as the venous samples.

**Text S2: Supplementary equations**

$$\frac{dX_1}{dt} = -k_a \cdot X_1 \quad \dots\dots\dots (\text{Eq. S1})$$

$$\frac{dX_2}{dt} = k_a \cdot X_1 - (k_e + k_{23} + k_{24}) \cdot X_2 + k_{32} \cdot X_3 + k_{42} \cdot X_4 \quad \dots\dots\dots (\text{Eq. S2})$$

$$\frac{dX_3}{dt} = k_{23} \cdot X_2 - k_{32} \cdot X_3 \quad \dots\dots\dots (\text{Eq. S3})$$

$$\frac{dX_4}{dt} = k_{24} \cdot X_2 - k_{42} \cdot X_2 \quad \dots\dots\dots (\text{Eq. S4})$$

$$C_{venous} = \frac{X_2}{V_c/F} \quad \dots\dots\dots (\text{Eq. S5})$$

$$C_{capillary} = \left( \frac{X_2}{V_c/F} \right) \cdot CapVen \text{ ratio} \quad \dots\dots\dots (\text{Eq. S6})$$

$$k_e = \frac{CL}{V_c} \quad \dots\dots\dots (\text{Eq. S7})$$

$$Q_1 = k_{23} \cdot V_c \quad \dots\dots\dots (\text{Eq. S8})$$

$$V_{P1} = \frac{Q_1}{k_{32}} \quad \dots\dots\dots (\text{Eq. S9})$$

$$Q_2 = k_{24} \cdot V_c \quad \dots\dots\dots (\text{Eq. S10})$$

$$V_{P2} = \frac{Q_2}{k_{42}} \quad \dots\dots\dots (\text{Eq. S11})$$

$$CL = CLi \cdot \left[ \frac{patient \ weight}{60} \right]^{0.75} \quad \dots\dots\dots (\text{Eq. S12})$$

$$V_c = V_{ci} \cdot \left[ \frac{patient \ weight}{60} \right] \quad \dots\dots\dots (\text{Eq. S13})$$

Where  $k_a$  is the absorption rate in hours.  $X_1$ ,  $X_2$ ,  $X_3$  and  $X_4$  respectively, represent the drug mass (in grams) in the gut (dose compartment), the blood (central compartment), peripheral compartment 1, and for piperazine only peripheral compartment 2.  $F$  is the bioavailable fraction of the drug.  $CL$  represents the drug clearance rate from the central compartment.  $Q_1$  and  $Q_2$  represent the intercompartmental clearance rates between the central and peripheral compartments 1 and 2, respectively.  $V_c$ ,  $V_{P1}$  and  $V_{P2}$  represent the apparent volumes of distribution of the drug in the central compartment and peripheral compartments 1 and 2, respectively.  $t$  represents time in hours,  $C$  the concentration in grams per liter, and  $CL$  and  $V_c$  are the weight adjusted individual clearance ( $CLi$ ) and individual volume of distribution ( $V_{ci}$ ), respectively.  $Q_1$ ,  $V_{P1}$ ,  $Q_2$  and  $V_{P2}$  values were assumed to be weight independent as weight scaling for these parameters resulted in similar or poorer PK predictions.

Capillary concentrations were modelled simultaneously with venous ones using **Equation S6**, where **CapVen** ratio represents the parameter that quantifies the ratio between capillary and venous concentration.

**Absorption model**

The absorption model used was a standard absorption model with an absorption rate  $k_a$  estimated for ivermectin and fixed for piperazine. No other absorption models (e.g. including transit compartments and lag times) were attempted due to the limited number of concentrations at <2 hours post dosing.

**Error model**

For ivermectin and piperazine we used a lambda error model (fixed-effect process noise multiplier of assay error), with a fixed L value set to 0.1 for all observations. The values (C0, C1, C2, C3) were used to estimate the error (standard deviation) of each observation for appropriate weighting in the fitting process, using the equation:  $SD = C0 + C1*[obs] + C2*[obs]^2 + C3*[obs]^3$  where [obs] is the observation (Neely 2012). For ivermectin, C0 was set to 5 or 10 (equal to LLOQ, for venous and capillary samples respectively) and C1 to 0.15 or 0.20 (assuming 15% or 20% intra-assay variability, the latter for concentrations within 10% of LLOQ). For piperazine, C0 was set to 1.5 (equal to LLOQ, for both venous and capillary samples) and C1 to 0.15 or 0.20 (as per ivermectin C1). C2 and C3 were set to zero for both drugs.

**Text S3: IVERMAL dose-response calculator**

The IVERMAL dose-response calculator is available as an Excel file:

- 1) Attached: in Adobe click "Document" (top ribbon), and then "Attachments" (left sidebar).
- 2) On the publication's webpage: <http://doi.org/10.1002/cpt.1219>

Screenshot:

| <b>IVERMAL dose-response calculator</b>                                                                     |                                                                                                      |
|-------------------------------------------------------------------------------------------------------------|------------------------------------------------------------------------------------------------------|
| <b>Drug properties:</b>                                                                                     |                                                                                                      |
| EC50:                                                                                                       | 15.9 ng/mL                                                                                           |
| Emin:                                                                                                       | 3.9 deaths/100 days                                                                                  |
| Emax:                                                                                                       | 49.5 deaths/100 days                                                                                 |
| Emin+Emax:                                                                                                  | 53.4 deaths/100 days                                                                                 |
| <br>                                                                                                        |                                                                                                      |
| <b>Calculator 1: What is the mosquitocidal activity of a specified drug concentration?</b>                  | <b>Calculator 2: Which drug concentration is required to achieve a desired mosquitocidal effect?</b> |
| Concentration: <b>0.16</b> ng/mL                                                                            | Incidence rate ratio: <b>1.33</b> fold increased mortality rate                                      |
| Effect: 4.4 deaths/100 days                                                                                 | Effect: 5.2 deaths/100 days                                                                          |
| Percentile: 1% of maximum effect                                                                            | Percentile: 3% of maximum effect                                                                     |
| Incidence rate ratio: 1.13 fold increased mortality rate                                                    | Concentration: 0.42 ng/mL                                                                            |
| <p>1. Instructions: insert values into the bold boxes</p> <p>2. Ref: Smit MR (2018) IVERMAL PK-PD Model</p> |                                                                                                      |

## Supplementary Figures

**Figure S1: Flowchart of pharmacokinetic model applied separately to both ivermectin and piperazine**

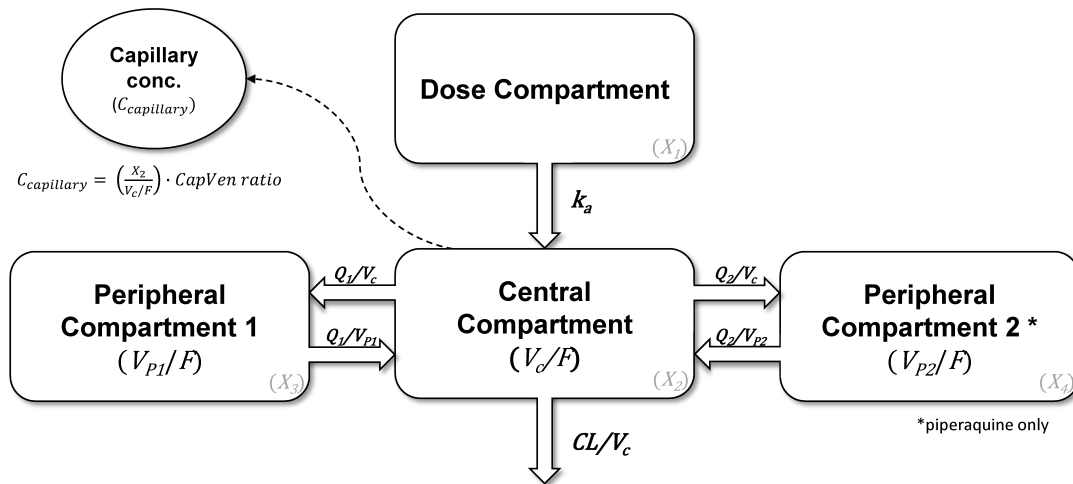

Where  $k_a$  is the absorption rate in hours.  $X_1$ ,  $X_2$ ,  $X_3$ , and  $X_4$ , respectively, represent the drug mass (in grams) in the gut (dose compartment), the blood (central compartment), and the two extra peripheral compartments (one for ivermectin).  $F$  is the bioavailable fraction of the drug.  $CL$  represents the drug clearance rate from the central compartment.  $Q_1$  and  $Q_2$  represent the intercompartmental clearance rates between the central and peripheral compartments 1 and 2, respectively.  $V_c$ ,  $V_{P1}$  and  $V_{P2}$  represent the apparent volumes of distribution of the drug in the central compartment and peripheral compartments 1 and 2, respectively. **CapVen ratio** represents the parameter that quantifies the ratio between capillary and venous concentration.

**Figure S2: Capillary vs. venous concentration ratios for ivermectin and piperazine**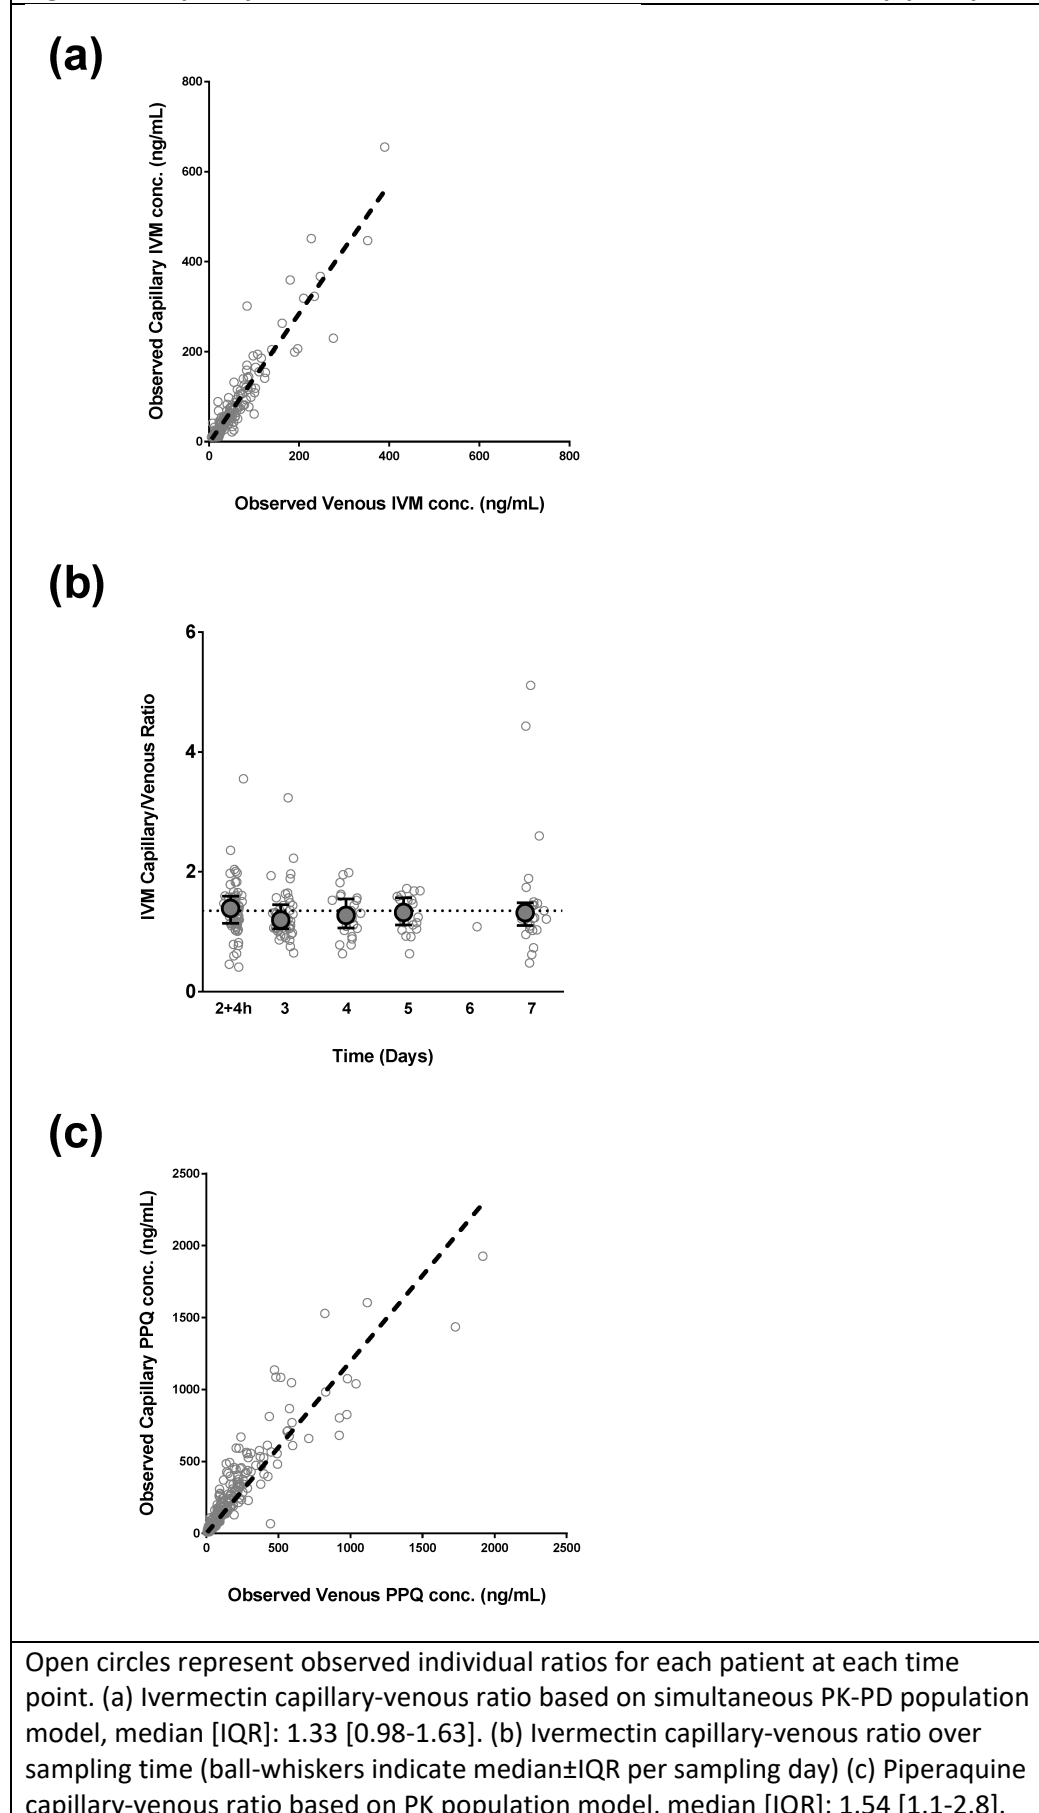

**Figure S3: Ivermectin vs. mosquito mortality (%) dose-response curves (LC<sub>50</sub> method)****(a) 7-day-LC<sub>50</sub>, unadjusted**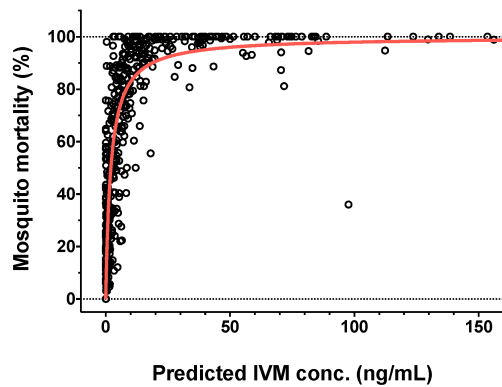**(b) 7-day-LC<sub>50</sub>, adjusted**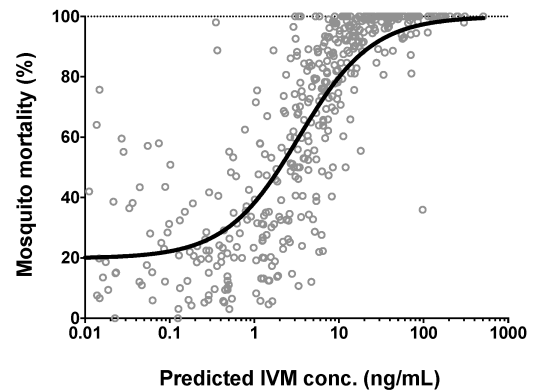**(c) 10-day-LC<sub>50</sub>, adjusted**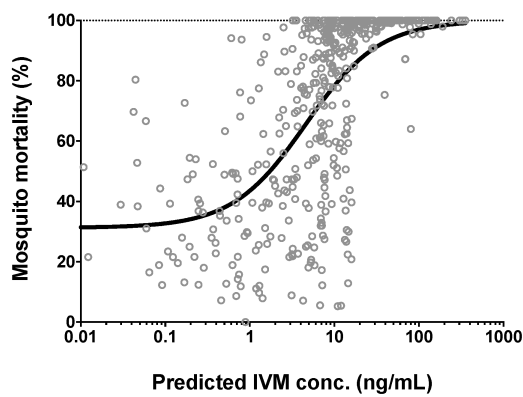**(d) 14-day-LC<sub>50</sub>, adjusted**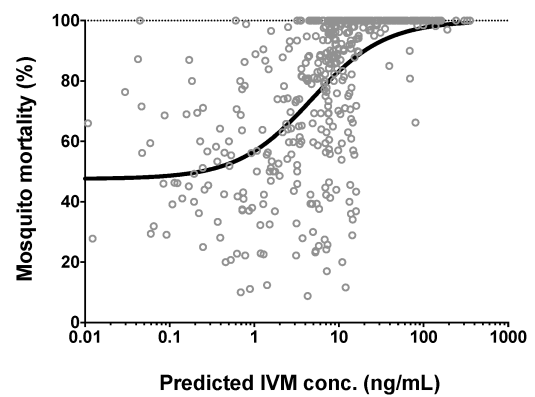

Using data from all study visits, mosquito mortality (expressed as a percentage) was assessed at the specified number of days (7, 10, or 14) post-feeding. In unadjusted models, baseline mortality is disregarded by forcing the model to pass through the origin. In adjusted models, baseline mortality is considered, where the Lethal Concentration 50% (LC<sub>50</sub>) is the concentration required to kill 50% of mosquitoes that would have otherwise survived the assay without ivermectin exposure. LC<sub>50</sub> values are shown in Table S3.



**Figure S4: Residual analysis of mosquito mortality rates (i.e., ivermectin's pharmacodynamic effect) over time, as predicted by the simultaneous PK/PD model vs. observed data**

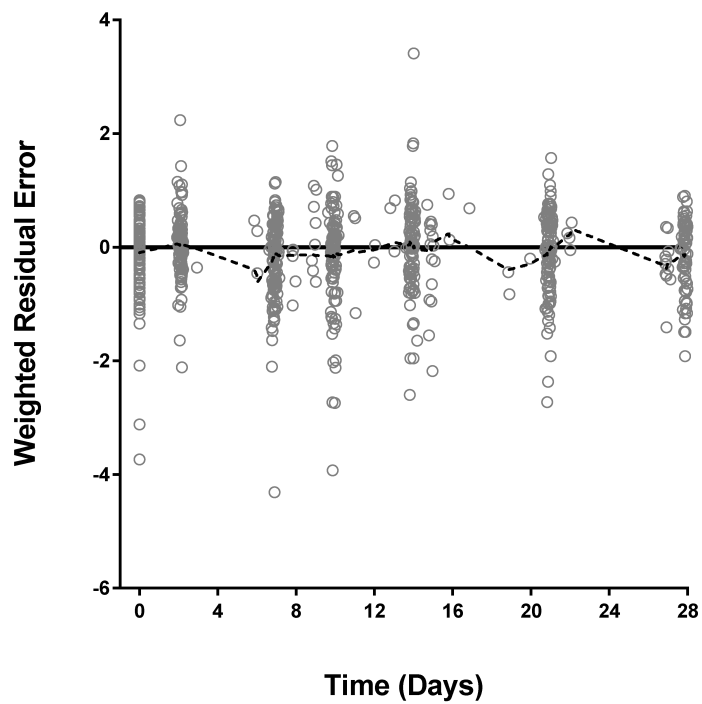

The lack of a time bias between study visits (Kruskal-Wallis:  $p < 0.05$ ;  $n = 109-141$ ) indicates a consistent concentration-effect relationship ( $EC_{50}$  and  $E_{max}$ ) through-out the study duration.

Figure S5: Piperavaquine vs. QTcF dose-response curves

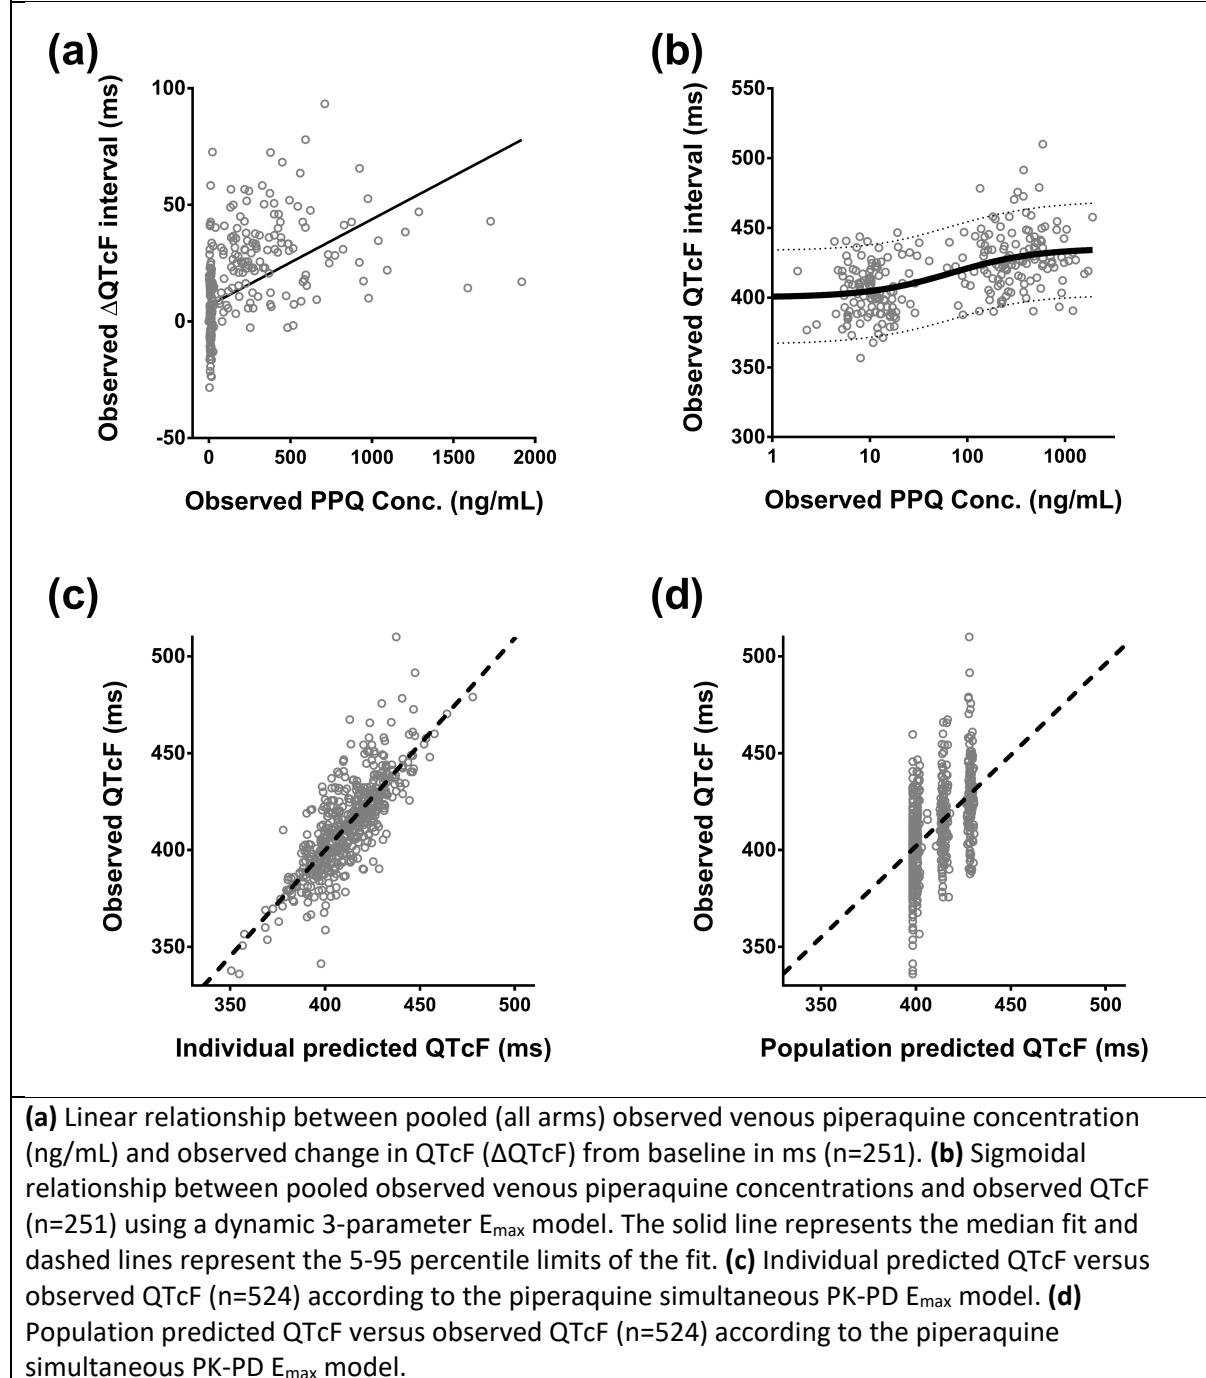

## Supplementary Tables

| <b>Table S1: Compartmental model fits for ivermectin and piperazine</b> |                        |                        |                        |                          |
|-------------------------------------------------------------------------|------------------------|------------------------|------------------------|--------------------------|
|                                                                         | <b>Ivermectin</b>      |                        | <b>Piperazine</b>      |                          |
|                                                                         | <b>One compartment</b> | <b>Two compartment</b> | <b>Two compartment</b> | <b>Three compartment</b> |
| -2 log likelihood                                                       | 6528.440               | 6202.912               | 17608.90               | 16375.37                 |
| AIC                                                                     | 6538.519               | 6217.061               | 17620.95               | 16391.45                 |
| BIC                                                                     | 6561.626               | 6249.373               | 17653.27               | 16434.52                 |

| <b>Table S2: Number of observed concentrations and outcomes (ivermectin and piperazine)</b> |                       |                          |                   |                      |                |                                    |                                |                   |                      |      |                          |                                |
|---------------------------------------------------------------------------------------------|-----------------------|--------------------------|-------------------|----------------------|----------------|------------------------------------|--------------------------------|-------------------|----------------------|------|--------------------------|--------------------------------|
| Time (days)                                                                                 | plasma samples venous | plasma samples capillary | ivermectin venous | ivermectin capillary | mortality rate | ivermectin venous + mortality rate | ivermectin: venous + capillary | piperazine venous | piperazine capillary | QTcF | piperazine venous + QTcF | piperazine: venous + capillary |
| 0                                                                                           | 141                   | -                        | 0                 | -                    | 141            | -                                  | -                              | 1                 | -                    | 141  | 1                        | -                              |
| 2                                                                                           | -                     | -                        | -                 | -                    | -              | -                                  | -                              | -                 | -                    | 132  | -                        | -                              |
| 2+4h                                                                                        | 133                   | 86                       | 88                | 58                   | 128            | 86                                 | 58                             | 133               | 87                   | 133  | 133                      | 87                             |
| 7                                                                                           | 128                   | 85                       | 70                | 30                   | 128            | 70                                 | 29                             | 128               | 85                   | -    | -                        | 85                             |
| 10                                                                                          | 118                   | -                        | 52                | -                    | 112            | 52                                 | -                              | 118               | -                    | -    | -                        | -                              |
| 14                                                                                          | 122                   | -                        | 29                | -                    | 119            | 28                                 | -                              | 122               | -                    | -    | -                        | -                              |
| 21                                                                                          | 117                   | -                        | 8                 | -                    | 111            | 7                                  | -                              | 115               | -                    | -    | -                        | -                              |
| 28                                                                                          | 118                   | -                        | 3                 | -                    | 111            | 3                                  | -                              | 117               | -                    | 118  | 117                      | -                              |
| Pop PK                                                                                      | 516                   | 162                      | 284               | 93                   | -              | -                                  | 90                             | 512               | 161                  | -    | -                        | 160                            |
| Total                                                                                       | 1,393                 | 335                      | 534               | 181                  | 850            | 246                                | 177                            | 1,246             | 333                  | 524  | 251                      | 332                            |

Pop PK= population pharmacokinetic samples which were drawn between days 0 to 28 and did not coincide with other outcomes. Ivermectin observations for days 21 and 28 are mostly absent as they are below the limit of quantitation.

| Table S3: Ivermectin LC <sub>50</sub> values by assay duration, and vs. previous studies |                                                                       |                                                                     |                                                                                                            |                                                                                                 |                      |
|------------------------------------------------------------------------------------------|-----------------------------------------------------------------------|---------------------------------------------------------------------|------------------------------------------------------------------------------------------------------------|-------------------------------------------------------------------------------------------------|----------------------|
| Duration of mosquito follow-up post-feeding (days):                                      | A. LC <sub>50</sub> unadjusted to baseline mortality (CI95%) (ng/mL): | B. LC <sub>50</sub> adjusted to baseline mortality (CI95%) (ng/mL): | C. Comparator in vivo study <sup>15</sup> LC <sub>50</sub> adjusted to baseline mortality (CI95%) (ng/mL): | D. Comparator in vitro studies LC <sub>50</sub> adjusted to baseline mortality (CI95%) (ng/mL): | Relative Difference: |
| 1                                                                                        | 1656 (1281-2287)                                                      | 3883 (2378-9552)                                                    | 1172 (499-N/A)                                                                                             |                                                                                                 |                      |
| 2                                                                                        | 19.71(17.5-22.3)                                                      | 26.79 (22.64-31.93)                                                 | 43.95 (36.30-54.87)                                                                                        |                                                                                                 |                      |
| 3                                                                                        | 7.89 (7.13-8.73)                                                      | 10.29 (8.96-11.86)                                                  | 20.94 (17.73-25.15)                                                                                        | 6.1 (3.4-11.0) <sup>15</sup>                                                                    | D vs B: 0.6          |
| 4                                                                                        | 5.07 (4.57-5.61)                                                      | 6.92 (6.02-7.98)                                                    | 15.40 (13.04-18.44)                                                                                        |                                                                                                 |                      |
| 5                                                                                        | 3.61 (3.24-4.01)                                                      | 5.26 (4.56-6.09)                                                    | 13.39 (11.24-16.18)                                                                                        | 22.4 (18.0-26.9) <sup>16</sup>                                                                  | D vs B: 4.3          |
| 6                                                                                        | 2.68 (2.39-32.99)                                                     | 4.13 (3.57-4.79)                                                    | 8.59 (7.09-10.52)                                                                                          |                                                                                                 |                      |
| 7                                                                                        | 2.08 (1.85-2.33)                                                      | 3.35 (2.89-3.89)                                                    | 7.92 (6.49-9.77)                                                                                           | 15.9 (14.6-17.3) <sup>17</sup>                                                                  | D vs B: 4.7          |
| 8                                                                                        | 1.74 (1.55-1.96)                                                      | 2.97 (2.56-3.46)                                                    | 7.43 (6.03-9.25)                                                                                           |                                                                                                 |                      |
| 9                                                                                        | 1.50 (1.32-1.70)                                                      | 2.78 (2.38-3.25)                                                    | 7.06 (5.69-8.86)                                                                                           | 19.8 (14.3-25.3) <sup>18</sup>                                                                  | D vs B: 7.1          |
| 10                                                                                       | 1.24 (1.08-1.41)                                                      | 2.55 (2.17-3.01)                                                    | 6.52 (5.22-8.23)                                                                                           |                                                                                                 | C vs B: 2.6          |
| 11                                                                                       | 1.15 (0.99-1.32)                                                      | 2.62 (2.22-3.11)                                                    |                                                                                                            |                                                                                                 |                      |
| 12                                                                                       | 0.97 (0.83-1.13)                                                      | 2.60 (2.18-3.10)                                                    |                                                                                                            |                                                                                                 |                      |
| 13                                                                                       | 0.80 (0.67-0.95)                                                      | 2.56 (2.13-3.08)                                                    |                                                                                                            |                                                                                                 |                      |
| 14                                                                                       | 0.62 (0.51-0.74)                                                      | 2.53 (2.09-3.07)                                                    |                                                                                                            |                                                                                                 |                      |
| 15                                                                                       | 0.45 (0.36-0.56)                                                      | 2.50 (2.04-3.07)                                                    |                                                                                                            |                                                                                                 |                      |
| 16                                                                                       | 0.31 (0.23-0.40)                                                      | 2.45 (1.98-3.06)                                                    |                                                                                                            |                                                                                                 |                      |
| 17                                                                                       | 0.17 (0.11-0.25)                                                      | 2.43 (1.95-3.06)                                                    |                                                                                                            |                                                                                                 |                      |
| 18                                                                                       | 0.012 (0.0054-0.027)                                                  | 2.34 (1.85-2.98)                                                    |                                                                                                            |                                                                                                 |                      |
| 19                                                                                       | <0.01                                                                 | 2.44 (1.90-3.16)                                                    |                                                                                                            |                                                                                                 |                      |
| 20                                                                                       | <0.01                                                                 | 2.42 (1.85-3.18)                                                    |                                                                                                            |                                                                                                 |                      |
| 21                                                                                       | <0.01                                                                 | 2.32 (1.74-3.12)                                                    |                                                                                                            |                                                                                                 |                      |
| 22                                                                                       | <0.01                                                                 | 2.31 (1.69-3.18)                                                    |                                                                                                            |                                                                                                 |                      |
| 23                                                                                       | <0.01                                                                 | 2.21 (1.58-3.13)                                                    |                                                                                                            |                                                                                                 |                      |
| 24                                                                                       | <0.01                                                                 | 2.19 (1.52-3.20)                                                    |                                                                                                            |                                                                                                 |                      |
| 25                                                                                       | <0.01                                                                 | 2.08 (1.40-3.14)                                                    |                                                                                                            |                                                                                                 |                      |
| 26                                                                                       | <0.01                                                                 | 1.92 (1.23-3.06)                                                    |                                                                                                            |                                                                                                 |                      |
| 27                                                                                       | <0.01                                                                 | 1.87 (1.14-3.12)                                                    |                                                                                                            |                                                                                                 |                      |
| 28                                                                                       | <0.01                                                                 | 1.97 (1.15-3.44)                                                    |                                                                                                            |                                                                                                 |                      |

LC<sub>50</sub>'s using predicted concentrations and 3-parameter method; Hill's coefficient was fixed to 1. LC<sub>50</sub>'s adjusted to baseline mortality are the concentrations required to kill 50% of mosquitoes that would have otherwise survived the assay without ivermectin exposure. Adjusted LC<sub>50</sub>'s are more consistent during follow-up than unadjusted LC<sub>50</sub>'s. Additionally, unadjusted LC<sub>50</sub>'s cannot be determined over longer follow-up periods due to high baseline mortality. Comparator *in vivo* values were calculated using author's dataset.<sup>15</sup> Comparator *in vitro* values as reported,<sup>16,17</sup> except for one study that was converted from mol/L to ng/mL,<sup>15</sup> and another study for which the SE was converted to CI95%.<sup>18</sup> One study did not report whether it was adjusted to baseline, however probit analysis with control population was used, so baseline adjustment is assumed.<sup>18</sup>

| Outcome                                                         | IVM-3x600<br>(N=47)        | IVM-3x300<br>(N=48)        | Placebo<br>(N=46)          | Mean <sup>†Δ</sup> or Risk <sup>‡</sup> difference (95% CI), p-value |                                            |                                           |
|-----------------------------------------------------------------|----------------------------|----------------------------|----------------------------|----------------------------------------------------------------------|--------------------------------------------|-------------------------------------------|
|                                                                 |                            |                            |                            | IVM-3x600<br>vs Placebo                                              | IVM-3x300<br>vs Placebo                    | IVM-3x600<br>vs IVM-3x300                 |
| QTcF interval<br>(Day 2+4h),<br>change from<br>baseline (ms)    | 27 (17)<br>(n=42)          | 33 (17)<br>(n=45)          | 29 (18)<br>(n=44)          | -0.8 (-8.0,<br>6.5), 0.84 <sup>†</sup>                               | 4.7 (-2.6,<br>11.9), 0.21 <sup>†</sup>     | -5.4 (-12.3,<br>1.5), 0.13 <sup>†</sup>   |
| QTcF interval<br>(Day 2+4h),<br>≥500 ms                         | 0/42<br>(0%)               | 1/45<br>(2.2%)             | 0/44<br>(0%)               | 0.0% (-0.4%,<br>3.7%), 1.00 <sup>‡</sup>                             | 2.2% (-1.4%,<br>5.8%), 0.23 <sup>‡</sup>   | -2.2% (-5.9%,<br>1.5%), 0.24 <sup>‡</sup> |
| Piperaquine<br>plasma<br>concentration<br>(Day 2+4h)<br>(ng/mL) | 313<br>(208-586)<br>(n=43) | 327<br>(179-545)<br>(n=45) | 269<br>(169-399)<br>(n=45) | 35.8 (-107.2,<br>178.7), 0.62 <sup>Δ</sup>                           | 28.9 (-108.1,<br>165.9), 0.68 <sup>Δ</sup> | 6.9 (-126.3,<br>140.0), 0.92 <sup>Δ</sup> |

Data are mean (SD), median (IQR), or n/N (%), unless otherwise specified. IVM-3x600=ivermectin 600 mcg/kg/day for 3 days. IVM-3x300=ivermectin 300 mcg/kg/day for 3 days.  
 QTcF=electrocardiogram QT interval, corrected for heart rate using Fredericia's formula.  
 Δ Mean difference (95% CI), p-value: obtained from GLM models.  
 † Mean difference (95% CI), p-value: obtained from GEE models adjusted for baseline measurement and repeated measures.  
 ‡ Risk Difference (95% CI), p-value: obtained from GLM models.

| Parameter                                                                                      | All Patients<br>(N=141)<br>[p5-p95] | IVM-3x600<br>(N=47)<br>[p5-p95] | IVM-3x300<br>(N=48)<br>[p5-p95] | Placebo<br>(N=46)<br>[p5-p95] |
|------------------------------------------------------------------------------------------------|-------------------------------------|---------------------------------|---------------------------------|-------------------------------|
| QTcF, baseline ( $E_{min}$ ) (ms)                                                              | 399.3<br>[377.5-416.3]              | 398.7<br>[371.9-413.2]          | 399.1<br>[379.5-415]            | 399.5<br>[379.8-416.5]        |
| ΔQTcF, maximum possible<br>change from baseline<br>( $E_{max}$ ) (ms)                          | 53.5<br>[31.1-122.9]                | 51.2<br>[32.2-119.6]            | 49.7<br>[31.2-123.3]            | 66.3<br>[27.2-118.3]          |
| QTcF, maximum possible<br>effect ( $E_{max}+E_{min}$ ) (ms)                                    | 449.8<br>[415.1-520.0]*             | 445.2<br>[421.3-520.0]          | 447.8<br>[417.2-520.0]          | 464.1<br>[415.4-520.0]        |
| Piperaquine concentration<br>achieving half-maximal<br>effect on QTcF ( $EC_{50}$ )<br>(ng/mL) | 181.7<br>[16.0-1200.0]              | 169.2<br>[16.0-1200.0]          | 199.0<br>[16.1-1200.0]          | 218.2<br>[15.9-1200.0]        |

Data are median [p5-p95]. IVM-3x600=ivermectin 600 mcg/kg/day for 3 days. IVM-3x300=ivermectin 300 mcg/kg/day for 3 days. QTcF=electrocardiogram QT interval, corrected for heart rate using Fredericia's formula.  
 \* 18 subjects did not display a concentration-effect relationship for piperaquine and QT interval and their  $EC_{50}$  was estimated at the upper limit of the prediction, 1200 ng/mL. Upper limit for maximum possible effect ( $E_{max}+E_{min}$ ) was set to be 520 ms which is 10 ms higher than the highest QT interval observed amongst all the patients.

**Table S6: Spearman's correlations (ivermectin and piperazine)**

(see following pages)

## Correlations

|                |          |                         | sex     | age    | weight |
|----------------|----------|-------------------------|---------|--------|--------|
| Spearman's rho | sex      | Correlation Coefficient | 1.000   | -.014  | -.070  |
|                |          | Sig. (2-tailed)         | .       | .869   | .411   |
|                |          | N                       | 141     | 141    | 141    |
|                | age      | Correlation Coefficient | -.014   | 1.000  | .178*  |
|                |          | Sig. (2-tailed)         | .869    | .      | .035   |
|                |          | N                       | 141     | 141    | 141    |
|                | weight   | Correlation Coefficient | -.070   | .178*  | 1.000  |
|                |          | Sig. (2-tailed)         | .411    | .035   | .      |
|                |          | N                       | 141     | 141    | 141    |
|                | height   | Correlation Coefficient | -.661** | .058   | .467** |
|                |          | Sig. (2-tailed)         | .000    | .493   | .000   |
|                |          | N                       | 141     | 141    | 141    |
|                | KaIVM    | Correlation Coefficient | .027    | .072   | -.197* |
|                |          | Sig. (2-tailed)         | .749    | .399   | .019   |
|                |          | N                       | 141     | 141    | 141    |
|                | ViIVM    | Correlation Coefficient | -.094   | -.120  | -.014  |
|                |          | Sig. (2-tailed)         | .267    | .157   | .871   |
|                |          | N                       | 141     | 141    | 141    |
|                | CLiIVM   | Correlation Coefficient | -.062   | .112   | -.020  |
|                |          | Sig. (2-tailed)         | .463    | .186   | .818   |
|                |          | N                       | 141     | 141    | 141    |
|                | KCP_IVM  | Correlation Coefficient | .226**  | .233** | .030   |
|                |          | Sig. (2-tailed)         | .007    | .005   | .724   |
|                |          | N                       | 141     | 141    | 141    |
|                | KPC_IVM  | Correlation Coefficient | -.005   | .121   | -.151  |
|                |          | Sig. (2-tailed)         | .949    | .151   | .073   |
|                |          | N                       | 141     | 141    | 141    |
|                | Va_IVM   | Correlation Coefficient | -.146   | .031   | .019   |
|                |          | Sig. (2-tailed)         | .084    | .716   | .827   |
|                |          | N                       | 141     | 141    | 141    |
|                | AUC_IVM  | Correlation Coefficient | .002    | .010   | .224*  |
|                |          | Sig. (2-tailed)         | .982    | .923   | .029   |
|                |          | N                       | 95      | 95     | 95     |
|                | Cmax_IVM | Correlation Coefficient | .095    | .032   | -.011  |
|                |          | Sig. (2-tailed)         | .359    | .760   | .917   |
|                |          | N                       | 95      | 95     | 95     |
|                | QTcF_0   | Correlation Coefficient | .415**  | .108   | .000   |
|                |          | Sig. (2-tailed)         | .000    | .204   | 1.000  |
|                |          | N                       | 141     | 141    | 141    |



## Correlations

|                |                         | height                  | KaIVM   | ViiVM   |         |
|----------------|-------------------------|-------------------------|---------|---------|---------|
| Spearman's rho | sex                     | Correlation Coefficient | -.661** | .027    | -.094   |
|                |                         | Sig. (2-tailed)         | .000    | .749    | .267    |
|                |                         | N                       | 141     | 141     | 141     |
|                | age                     | Correlation Coefficient | .058    | .072    | -.120   |
|                |                         | Sig. (2-tailed)         | .493    | .399    | .157    |
|                |                         | N                       | 141     | 141     | 141     |
|                | weight                  | Correlation Coefficient | .467**  | -.197*  | -.014   |
|                |                         | Sig. (2-tailed)         | .000    | .019    | .871    |
|                |                         | N                       | 141     | 141     | 141     |
|                | height                  | Correlation Coefficient | 1.000   | -.054   | .014    |
|                |                         | Sig. (2-tailed)         | .       | .526    | .872    |
|                |                         | N                       | 141     | 141     | 141     |
|                | KaIVM                   | Correlation Coefficient | -.054   | 1.000   | -.116   |
|                |                         | Sig. (2-tailed)         | .526    | .       | .171    |
|                |                         | N                       | 141     | 141     | 141     |
|                | ViiVM                   | Correlation Coefficient | .014    | -.116   | 1.000   |
|                |                         | Sig. (2-tailed)         | .872    | .171    | .       |
|                |                         | N                       | 141     | 141     | 141     |
|                | CLiIVM                  | Correlation Coefficient | -.042   | .230**  | .360**  |
|                |                         | Sig. (2-tailed)         | .624    | .006    | .000    |
|                |                         | N                       | 141     | 141     | 141     |
|                | KCP_IVM                 | Correlation Coefficient | -.173*  | .595**  | -.305** |
|                |                         | Sig. (2-tailed)         | .041    | .000    | .000    |
|                |                         | N                       | 141     | 141     | 141     |
|                | KPC_IVM                 | Correlation Coefficient | -.089   | .639**  | -.238** |
|                |                         | Sig. (2-tailed)         | .291    | .000    | .004    |
|                |                         | N                       | 141     | 141     | 141     |
|                | Va_IVM                  | Correlation Coefficient | .080    | -.311** | .344**  |
|                |                         | Sig. (2-tailed)         | .347    | .000    | .000    |
|                |                         | N                       | 141     | 141     | 141     |
| AUC_IVM        | Correlation Coefficient | .159                    | .069    | -.363** |         |
|                | Sig. (2-tailed)         | .124                    | .507    | .000    |         |
|                | N                       | 95                      | 95      | 95      |         |
| Cmax_IVM       | Correlation Coefficient | .028                    | .399**  | -.753** |         |
|                | Sig. (2-tailed)         | .784                    | .000    | .000    |         |
|                | N                       | 95                      | 95      | 95      |         |
| QTcF_0         | Correlation Coefficient | -.168*                  | -.144   | .018    |         |
|                | Sig. (2-tailed)         | .046                    | .088    | .831    |         |
|                | N                       | 141                     | 141     | 141     |         |

### Correlations

|                |                         | CLiIVM                  | KCP_IVM | KPC_IVM |         |
|----------------|-------------------------|-------------------------|---------|---------|---------|
| Spearman's rho | sex                     | Correlation Coefficient | -.062   | .226**  | -.005   |
|                |                         | Sig. (2-tailed)         | .463    | .007    | .949    |
|                |                         | N                       | 141     | 141     | 141     |
|                | age                     | Correlation Coefficient | .112    | .233**  | .121    |
|                |                         | Sig. (2-tailed)         | .186    | .005    | .151    |
|                |                         | N                       | 141     | 141     | 141     |
|                | weight                  | Correlation Coefficient | -.020   | .030    | -.151   |
|                |                         | Sig. (2-tailed)         | .818    | .724    | .073    |
|                |                         | N                       | 141     | 141     | 141     |
|                | height                  | Correlation Coefficient | -.042   | -.173*  | -.089   |
|                |                         | Sig. (2-tailed)         | .624    | .041    | .291    |
|                |                         | N                       | 141     | 141     | 141     |
|                | KaIVM                   | Correlation Coefficient | .230**  | .595**  | .639**  |
|                |                         | Sig. (2-tailed)         | .006    | .000    | .000    |
|                |                         | N                       | 141     | 141     | 141     |
|                | ViIVM                   | Correlation Coefficient | .360**  | -.305** | -.238** |
|                |                         | Sig. (2-tailed)         | .000    | .000    | .004    |
|                |                         | N                       | 141     | 141     | 141     |
|                | CLiIVM                  | Correlation Coefficient | 1.000   | .431**  | .084    |
|                |                         | Sig. (2-tailed)         | .       | .000    | .321    |
|                |                         | N                       | 141     | 141     | 141     |
|                | KCP_IVM                 | Correlation Coefficient | .431**  | 1.000   | .531**  |
|                |                         | Sig. (2-tailed)         | .000    | .       | .000    |
|                |                         | N                       | 141     | 141     | 141     |
|                | KPC_IVM                 | Correlation Coefficient | .084    | .531**  | 1.000   |
|                |                         | Sig. (2-tailed)         | .321    | .000    | .       |
|                |                         | N                       | 141     | 141     | 141     |
|                | Va_IVM                  | Correlation Coefficient | .077    | -.310** | -.283** |
|                |                         | Sig. (2-tailed)         | .362    | .000    | .001    |
|                |                         | N                       | 141     | 141     | 141     |
| AUC_IVM        | Correlation Coefficient | -.455**                 | -.015   | .089    |         |
|                | Sig. (2-tailed)         | .000                    | .887    | .392    |         |
|                | N                       | 95                      | 95      | 95      |         |
| Cmax_IVM       | Correlation Coefficient | -.284**                 | .351**  | .252*   |         |
|                | Sig. (2-tailed)         | .005                    | .000    | .014    |         |
|                | N                       | 95                      | 95      | 95      |         |
| QTcF_0         | Correlation Coefficient | -.163                   | -.077   | -.152   |         |
|                | Sig. (2-tailed)         | .053                    | .361    | .072    |         |
|                | N                       | 141                     | 141     | 141     |         |

## Correlations

|                |                         |                         | Va_IVM  | AUC_IVM | Cmax_IVM |
|----------------|-------------------------|-------------------------|---------|---------|----------|
| Spearman's rho | sex                     | Correlation Coefficient | -.146   | .002    | .095     |
|                |                         | Sig. (2-tailed)         | .084    | .982    | .359     |
|                |                         | N                       | 141     | 95      | 95       |
|                | age                     | Correlation Coefficient | .031    | .010    | .032     |
|                |                         | Sig. (2-tailed)         | .716    | .923    | .760     |
|                |                         | N                       | 141     | 95      | 95       |
|                | weight                  | Correlation Coefficient | .019    | .224*   | -.011    |
|                |                         | Sig. (2-tailed)         | .827    | .029    | .917     |
|                |                         | N                       | 141     | 95      | 95       |
|                | height                  | Correlation Coefficient | .080    | .159    | .028     |
|                |                         | Sig. (2-tailed)         | .347    | .124    | .784     |
|                |                         | N                       | 141     | 95      | 95       |
|                | KaIVM                   | Correlation Coefficient | -.311** | .069    | .399**   |
|                |                         | Sig. (2-tailed)         | .000    | .507    | .000     |
|                |                         | N                       | 141     | 95      | 95       |
|                | ViIVM                   | Correlation Coefficient | .344**  | -.363** | -.753**  |
|                |                         | Sig. (2-tailed)         | .000    | .000    | .000     |
|                |                         | N                       | 141     | 95      | 95       |
|                | CLiIVM                  | Correlation Coefficient | .077    | -.455** | -.284**  |
|                |                         | Sig. (2-tailed)         | .362    | .000    | .005     |
|                |                         | N                       | 141     | 95      | 95       |
|                | KCP_IVM                 | Correlation Coefficient | -.310** | -.015   | .351**   |
|                |                         | Sig. (2-tailed)         | .000    | .887    | .000     |
|                |                         | N                       | 141     | 95      | 95       |
|                | KPC_IVM                 | Correlation Coefficient | -.283** | .089    | .252*    |
|                |                         | Sig. (2-tailed)         | .001    | .392    | .014     |
|                |                         | N                       | 141     | 95      | 95       |
|                | Va_IVM                  | Correlation Coefficient | 1.000   | -.224*  | -.517**  |
|                |                         | Sig. (2-tailed)         | .       | .029    | .000     |
|                |                         | N                       | 141     | 95      | 95       |
| AUC_IVM        | Correlation Coefficient | -.224*                  | 1.000   | .663**  |          |
|                | Sig. (2-tailed)         | .029                    | .       | .000    |          |
|                | N                       | 95                      | 95      | 95      |          |
| Cmax_IVM       | Correlation Coefficient | -.517**                 | .663**  | 1.000   |          |
|                | Sig. (2-tailed)         | .000                    | .000    | .       |          |
|                | N                       | 95                      | 95      | 95      |          |
| QTcF_0         | Correlation Coefficient | .103                    | -.005   | -.066   |          |
|                | Sig. (2-tailed)         | .226                    | .963    | .528    |          |
|                | N                       | 141                     | 95      | 95      |          |

### Correlations

|                |          |                         | QTcF_0 | QTcF_48 | QTcF_52 |
|----------------|----------|-------------------------|--------|---------|---------|
| Spearman's rho | sex      | Correlation Coefficient | .415** | .391**  | .420**  |
|                |          | Sig. (2-tailed)         | .000   | .000    | .000    |
|                |          | N                       | 141    | 134     | 131     |
|                | age      | Correlation Coefficient | .108   | .181*   | .061    |
|                |          | Sig. (2-tailed)         | .204   | .037    | .489    |
|                |          | N                       | 141    | 134     | 131     |
|                | weight   | Correlation Coefficient | .000   | .050    | -.059   |
|                |          | Sig. (2-tailed)         | 1.000  | .562    | .501    |
|                |          | N                       | 141    | 134     | 131     |
|                | height   | Correlation Coefficient | -.168* | -.216*  | -.251** |
|                |          | Sig. (2-tailed)         | .046   | .012    | .004    |
|                |          | N                       | 141    | 134     | 131     |
|                | KaIVM    | Correlation Coefficient | -.144  | -.187*  | -.206*  |
|                |          | Sig. (2-tailed)         | .088   | .030    | .018    |
|                |          | N                       | 141    | 134     | 131     |
|                | ViIVM    | Correlation Coefficient | .018   | .004    | -.051   |
|                |          | Sig. (2-tailed)         | .831   | .965    | .563    |
|                |          | N                       | 141    | 134     | 131     |
|                | CLiIVM   | Correlation Coefficient | -.163  | -.221*  | -.257** |
|                |          | Sig. (2-tailed)         | .053   | .010    | .003    |
|                |          | N                       | 141    | 134     | 131     |
|                | KCP_IVM  | Correlation Coefficient | -.077  | -.112   | -.181*  |
|                |          | Sig. (2-tailed)         | .361   | .197    | .038    |
|                |          | N                       | 141    | 134     | 131     |
|                | KPC_IVM  | Correlation Coefficient | -.152  | -.098   | -.047   |
|                |          | Sig. (2-tailed)         | .072   | .258    | .595    |
|                |          | N                       | 141    | 134     | 131     |
|                | Va_IVM   | Correlation Coefficient | .103   | .125    | .126    |
|                |          | Sig. (2-tailed)         | .226   | .150    | .151    |
|                |          | N                       | 141    | 134     | 131     |
|                | AUC_IVM  | Correlation Coefficient | -.005  | .002    | -.044   |
|                |          | Sig. (2-tailed)         | .963   | .985    | .689    |
|                |          | N                       | 95     | 89      | 87      |
|                | Cmax_IVM | Correlation Coefficient | -.066  | -.119   | -.090   |
|                |          | Sig. (2-tailed)         | .528   | .266    | .409    |
|                |          | N                       | 95     | 89      | 87      |
|                | QTcF_0   | Correlation Coefficient | 1.000  | .617**  | .669**  |
|                |          | Sig. (2-tailed)         | .      | .000    | .000    |
|                |          | N                       | 141    | 134     | 131     |

## Correlations

|                |          | QTcF_672                | dQTcF_52 | ClI_PPQ |        |
|----------------|----------|-------------------------|----------|---------|--------|
| Spearman's rho | sex      | Correlation Coefficient | .561**   | .000    | -.119  |
|                |          | Sig. (2-tailed)         | .000     | .996    | .159   |
|                |          | N                       | 118      | 131     | 141    |
|                | age      | Correlation Coefficient | .200*    | -.069   | .225** |
|                |          | Sig. (2-tailed)         | .030     | .436    | .007   |
|                |          | N                       | 118      | 131     | 141    |
|                | weight   | Correlation Coefficient | .120     | .034    | .114   |
|                |          | Sig. (2-tailed)         | .195     | .702    | .180   |
|                |          | N                       | 118      | 131     | 141    |
|                | height   | Correlation Coefficient | -.307**  | -.079   | .053   |
|                |          | Sig. (2-tailed)         | .001     | .368    | .536   |
|                |          | N                       | 118      | 131     | 141    |
|                | KaIVM    | Correlation Coefficient | -.077    | -.087   | .029   |
|                |          | Sig. (2-tailed)         | .406     | .323    | .735   |
|                |          | N                       | 118      | 131     | 141    |
|                | ViIVM    | Correlation Coefficient | -.090    | -.079   | .094   |
|                |          | Sig. (2-tailed)         | .334     | .372    | .269   |
|                |          | N                       | 118      | 131     | 141    |
|                | CLiIVM   | Correlation Coefficient | -.197*   | -.121   | .239** |
|                |          | Sig. (2-tailed)         | .032     | .169    | .004   |
|                |          | N                       | 118      | 131     | 141    |
|                | KCP_IVM  | Correlation Coefficient | .068     | -.100   | .087   |
|                |          | Sig. (2-tailed)         | .465     | .256    | .307   |
|                |          | N                       | 118      | 131     | 141    |
|                | KPC_IVM  | Correlation Coefficient | .055     | .060    | .015   |
|                |          | Sig. (2-tailed)         | .552     | .498    | .864   |
|                |          | N                       | 118      | 131     | 141    |
|                | Va_IVM   | Correlation Coefficient | .145     | .067    | -.011  |
|                |          | Sig. (2-tailed)         | .118     | .448    | .901   |
|                |          | N                       | 118      | 131     | 141    |
|                | AUC_IVM  | Correlation Coefficient | -.029    | .031    | -.145  |
|                |          | Sig. (2-tailed)         | .803     | .774    | .160   |
|                |          | N                       | 78       | 87      | 95     |
|                | Cmax_IVM | Correlation Coefficient | -.066    | -.043   | -.072  |
|                |          | Sig. (2-tailed)         | .567     | .689    | .490   |
|                |          | N                       | 78       | 87      | 95     |
|                | QTcF_0   | Correlation Coefficient | .686**   | -.362** | .002   |
|                |          | Sig. (2-tailed)         | .000     | .000    | .986   |
|                |          | N                       | 118      | 131     | 141    |

### Correlations

|                |          |                         | Vi_PPQ | k23_PPQ | k32_PPQ |
|----------------|----------|-------------------------|--------|---------|---------|
| Spearman's rho | sex      | Correlation Coefficient | -.160  | -.067   | -.128   |
|                |          | Sig. (2-tailed)         | .057   | .433    | .129    |
|                |          | N                       | 141    | 141     | 141     |
|                | age      | Correlation Coefficient | .156   | .101    | .013    |
|                |          | Sig. (2-tailed)         | .065   | .234    | .881    |
|                |          | N                       | 141    | 141     | 141     |
|                | weight   | Correlation Coefficient | .167*  | .071    | -.002   |
|                |          | Sig. (2-tailed)         | .048   | .405    | .977    |
|                |          | N                       | 141    | 141     | 141     |
|                | height   | Correlation Coefficient | .092   | .030    | .131    |
|                |          | Sig. (2-tailed)         | .277   | .727    | .121    |
|                |          | N                       | 141    | 141     | 141     |
|                | KaIVM    | Correlation Coefficient | -.025  | -.091   | -.060   |
|                |          | Sig. (2-tailed)         | .770   | .283    | .477    |
|                |          | N                       | 141    | 141     | 141     |
|                | ViIVM    | Correlation Coefficient | .226** | .045    | -.135   |
|                |          | Sig. (2-tailed)         | .007   | .596    | .110    |
|                |          | N                       | 141    | 141     | 141     |
|                | CLiIVM   | Correlation Coefficient | .260** | .030    | -.137   |
|                |          | Sig. (2-tailed)         | .002   | .724    | .106    |
|                |          | N                       | 141    | 141     | 141     |
|                | KCP_IVM  | Correlation Coefficient | .022   | -.016   | -.079   |
|                |          | Sig. (2-tailed)         | .798   | .853    | .354    |
|                |          | N                       | 141    | 141     | 141     |
|                | KPC_IVM  | Correlation Coefficient | -.015  | -.159   | .079    |
|                |          | Sig. (2-tailed)         | .856   | .060    | .351    |
|                |          | N                       | 141    | 141     | 141     |
|                | Va_IVM   | Correlation Coefficient | -.028  | .180*   | .074    |
|                |          | Sig. (2-tailed)         | .743   | .033    | .385    |
|                |          | N                       | 141    | 141     | 141     |
|                | AUC_IVM  | Correlation Coefficient | -.186  | -.114   | .041    |
|                |          | Sig. (2-tailed)         | .071   | .273    | .690    |
|                |          | N                       | 95     | 95      | 95      |
|                | Cmax_IVM | Correlation Coefficient | -.194  | -.170   | .019    |
|                |          | Sig. (2-tailed)         | .060   | .100    | .852    |
|                |          | N                       | 95     | 95      | 95      |
|                | QTcF_0   | Correlation Coefficient | -.138  | -.019   | -.029   |
|                |          | Sig. (2-tailed)         | .102   | .822    | .732    |
|                |          | N                       | 141    | 141     | 141     |

### Correlations

|                |                         |                         | k24_PPQ           | k42_PPQ | CAP_PPQ           |
|----------------|-------------------------|-------------------------|-------------------|---------|-------------------|
| Spearman's rho | sex                     | Correlation Coefficient | .046              | -.124   | -.018             |
|                |                         | Sig. (2-tailed)         | .586              | .142    | .832              |
|                |                         | N                       | 141               | 141     | 141               |
|                | age                     | Correlation Coefficient | .103              | .034    | .131              |
|                |                         | Sig. (2-tailed)         | .223              | .690    | .121              |
|                |                         | N                       | 141               | 141     | 141               |
|                | weight                  | Correlation Coefficient | .011              | -.012   | -.026             |
|                |                         | Sig. (2-tailed)         | .895              | .888    | .760              |
|                |                         | N                       | 141               | 141     | 141               |
|                | height                  | Correlation Coefficient | -.078             | .083    | -.082             |
|                |                         | Sig. (2-tailed)         | .359              | .326    | .336              |
|                |                         | N                       | 141               | 141     | 141               |
|                | KaIVM                   | Correlation Coefficient | .057              | -.051   | -.078             |
|                |                         | Sig. (2-tailed)         | .503              | .546    | .358              |
|                |                         | N                       | 141               | 141     | 141               |
|                | ViIVM                   | Correlation Coefficient | -.072             | -.031   | .210 <sup>*</sup> |
|                |                         | Sig. (2-tailed)         | .396              | .717    | .012              |
|                |                         | N                       | 141               | 141     | 141               |
|                | CLiIVM                  | Correlation Coefficient | .023              | .004    | .109              |
|                |                         | Sig. (2-tailed)         | .789              | .965    | .200              |
|                |                         | N                       | 141               | 141     | 141               |
|                | KCP_IVM                 | Correlation Coefficient | .172 <sup>*</sup> | -.037   | -.029             |
|                |                         | Sig. (2-tailed)         | .041              | .662    | .734              |
|                |                         | N                       | 141               | 141     | 141               |
|                | KPC_IVM                 | Correlation Coefficient | .105              | .040    | -.004             |
|                |                         | Sig. (2-tailed)         | .215              | .637    | .963              |
|                |                         | N                       | 141               | 141     | 141               |
|                | Va_IVM                  | Correlation Coefficient | .027              | .057    | .043              |
|                |                         | Sig. (2-tailed)         | .748              | .505    | .615              |
|                |                         | N                       | 141               | 141     | 141               |
| AUC_IVM        | Correlation Coefficient | -.029                   | -.012             | -.050   |                   |
|                | Sig. (2-tailed)         | .777                    | .906              | .632    |                   |
|                | N                       | 95                      | 95                | 95      |                   |
| Cmax_IVM       | Correlation Coefficient | .019                    | -.032             | -.129   |                   |
|                | Sig. (2-tailed)         | .853                    | .760              | .212    |                   |
|                | N                       | 95                      | 95                | 95      |                   |
| QTcF_0         | Correlation Coefficient | .216 <sup>*</sup>       | .095              | .164    |                   |
|                | Sig. (2-tailed)         | .010                    | .265              | .052    |                   |
|                | N                       | 141                     | 141               | 141     |                   |

## Correlations

|                |          |                         | PPQAUC              | PPQCmax             | ARM                |
|----------------|----------|-------------------------|---------------------|---------------------|--------------------|
| Spearman's rho | sex      | Correlation Coefficient | .113                | .171 <sup>*</sup>   | .011               |
|                |          | Sig. (2-tailed)         | .182                | .043                | .901               |
|                |          | N                       | 141                 | 141                 | 141                |
|                | age      | Correlation Coefficient | -.187 <sup>*</sup>  | -.058               | -.014              |
|                |          | Sig. (2-tailed)         | .026                | .492                | .869               |
|                |          | N                       | 141                 | 141                 | 141                |
|                | weight   | Correlation Coefficient | -.069               | -.115               | .009               |
|                |          | Sig. (2-tailed)         | .417                | .173                | .917               |
|                |          | N                       | 141                 | 141                 | 141                |
|                | height   | Correlation Coefficient | -.028               | -.100               | .030               |
|                |          | Sig. (2-tailed)         | .744                | .237                | .720               |
|                |          | N                       | 141                 | 141                 | 141                |
|                | KaIVM    | Correlation Coefficient | -.078               | -.040               | .008               |
|                |          | Sig. (2-tailed)         | .360                | .638                | .928               |
|                |          | N                       | 141                 | 141                 | 141                |
|                | ViIVM    | Correlation Coefficient | -.201 <sup>*</sup>  | -.259 <sup>**</sup> | -.104              |
|                |          | Sig. (2-tailed)         | .017                | .002                | .219               |
|                |          | N                       | 141                 | 141                 | 141                |
|                | CLiIVM   | Correlation Coefficient | -.349 <sup>**</sup> | -.280 <sup>**</sup> | -.078              |
|                |          | Sig. (2-tailed)         | .000                | .001                | .359               |
|                |          | N                       | 141                 | 141                 | 141                |
|                | KCP_IVM  | Correlation Coefficient | -.133               | -.019               | .135               |
|                |          | Sig. (2-tailed)         | .115                | .819                | .112               |
|                |          | N                       | 141                 | 141                 | 141                |
|                | KPC_IVM  | Correlation Coefficient | -.037               | .064                | -.074              |
|                |          | Sig. (2-tailed)         | .666                | .448                | .383               |
|                |          | N                       | 141                 | 141                 | 141                |
|                | Va_IVM   | Correlation Coefficient | -.001               | .005                | -.007              |
|                |          | Sig. (2-tailed)         | .988                | .949                | .937               |
|                |          | N                       | 141                 | 141                 | 141                |
|                | AUC_IVM  | Correlation Coefficient | .424 <sup>**</sup>  | .248 <sup>*</sup>   | .577 <sup>**</sup> |
|                |          | Sig. (2-tailed)         | .000                | .015                | .000               |
|                |          | N                       | 95                  | 95                  | 95                 |
|                | Cmax_IVM | Correlation Coefficient | .186                | .207 <sup>*</sup>   | .591 <sup>**</sup> |
|                |          | Sig. (2-tailed)         | .071                | .044                | .000               |
|                |          | N                       | 95                  | 95                  | 95                 |
|                | QTcF_0   | Correlation Coefficient | .058                | .167 <sup>*</sup>   | -.008              |
|                |          | Sig. (2-tailed)         | .491                | .047                | .923               |
|                |          | N                       | 141                 | 141                 | 141                |



## Correlations

|          |                         | sex    | age    | weight |
|----------|-------------------------|--------|--------|--------|
| QTcF_48  | Correlation Coefficient | .391** | .181*  | .050   |
|          | Sig. (2-tailed)         | .000   | .037   | .562   |
|          | N                       | 134    | 134    | 134    |
| QTcF_52  | Correlation Coefficient | .420** | .061   | -.059  |
|          | Sig. (2-tailed)         | .000   | .489   | .501   |
|          | N                       | 131    | 131    | 131    |
| QTcF_672 | Correlation Coefficient | .561** | .200*  | .120   |
|          | Sig. (2-tailed)         | .000   | .030   | .195   |
|          | N                       | 118    | 118    | 118    |
| dQTcF_52 | Correlation Coefficient | .000   | -.069  | .034   |
|          | Sig. (2-tailed)         | .996   | .436   | .702   |
|          | N                       | 131    | 131    | 131    |
| Cli_PPQ  | Correlation Coefficient | -.119  | .225** | .114   |
|          | Sig. (2-tailed)         | .159   | .007   | .180   |
|          | N                       | 141    | 141    | 141    |
| Vi_PPQ   | Correlation Coefficient | -.160  | .156   | .167*  |
|          | Sig. (2-tailed)         | .057   | .065   | .048   |
|          | N                       | 141    | 141    | 141    |
| k23_PPQ  | Correlation Coefficient | -.067  | .101   | .071   |
|          | Sig. (2-tailed)         | .433   | .234   | .405   |
|          | N                       | 141    | 141    | 141    |
| k32_PPQ  | Correlation Coefficient | -.128  | .013   | -.002  |
|          | Sig. (2-tailed)         | .129   | .881   | .977   |
|          | N                       | 141    | 141    | 141    |
| k24_PPQ  | Correlation Coefficient | .046   | .103   | .011   |
|          | Sig. (2-tailed)         | .586   | .223   | .895   |
|          | N                       | 141    | 141    | 141    |
| k42_PPQ  | Correlation Coefficient | -.124  | .034   | -.012  |
|          | Sig. (2-tailed)         | .142   | .690   | .888   |
|          | N                       | 141    | 141    | 141    |
| CAP_PPQ  | Correlation Coefficient | -.018  | .131   | -.026  |
|          | Sig. (2-tailed)         | .832   | .121   | .760   |
|          | N                       | 141    | 141    | 141    |
| PPQAUC   | Correlation Coefficient | .113   | -.187* | -.069  |
|          | Sig. (2-tailed)         | .182   | .026   | .417   |
|          | N                       | 141    | 141    | 141    |
| PPQcmax  | Correlation Coefficient | .171*  | -.058  | -.115  |
|          | Sig. (2-tailed)         | .043   | .492   | .173   |
|          | N                       | 141    | 141    | 141    |

## Correlations

|          |                         | height  | KalVM  | VilVM   |
|----------|-------------------------|---------|--------|---------|
| QTcF_48  | Correlation Coefficient | -.216*  | -.187* | .004    |
|          | Sig. (2-tailed)         | .012    | .030   | .965    |
|          | N                       | 134     | 134    | 134     |
| QTcF_52  | Correlation Coefficient | -.251** | -.206* | -.051   |
|          | Sig. (2-tailed)         | .004    | .018   | .563    |
|          | N                       | 131     | 131    | 131     |
| QTcF_672 | Correlation Coefficient | -.307** | -.077  | -.090   |
|          | Sig. (2-tailed)         | .001    | .406   | .334    |
|          | N                       | 118     | 118    | 118     |
| dQTcF_52 | Correlation Coefficient | -.079   | -.087  | -.079   |
|          | Sig. (2-tailed)         | .368    | .323   | .372    |
|          | N                       | 131     | 131    | 131     |
| Cli_PPQ  | Correlation Coefficient | .053    | .029   | .094    |
|          | Sig. (2-tailed)         | .536    | .735   | .269    |
|          | N                       | 141     | 141    | 141     |
| Vi_PPQ   | Correlation Coefficient | .092    | -.025  | .226**  |
|          | Sig. (2-tailed)         | .277    | .770   | .007    |
|          | N                       | 141     | 141    | 141     |
| k23_PPQ  | Correlation Coefficient | .030    | -.091  | .045    |
|          | Sig. (2-tailed)         | .727    | .283   | .596    |
|          | N                       | 141     | 141    | 141     |
| k32_PPQ  | Correlation Coefficient | .131    | -.060  | -.135   |
|          | Sig. (2-tailed)         | .121    | .477   | .110    |
|          | N                       | 141     | 141    | 141     |
| k24_PPQ  | Correlation Coefficient | -.078   | .057   | -.072   |
|          | Sig. (2-tailed)         | .359    | .503   | .396    |
|          | N                       | 141     | 141    | 141     |
| k42_PPQ  | Correlation Coefficient | .083    | -.051  | -.031   |
|          | Sig. (2-tailed)         | .326    | .546   | .717    |
|          | N                       | 141     | 141    | 141     |
| CAP_PPQ  | Correlation Coefficient | -.082   | -.078  | .210*   |
|          | Sig. (2-tailed)         | .336    | .358   | .012    |
|          | N                       | 141     | 141    | 141     |
| PPQAUC   | Correlation Coefficient | -.028   | -.078  | -.201*  |
|          | Sig. (2-tailed)         | .744    | .360   | .017    |
|          | N                       | 141     | 141    | 141     |
| PPQcmax  | Correlation Coefficient | -.100   | -.040  | -.259** |
|          | Sig. (2-tailed)         | .237    | .638   | .002    |
|          | N                       | 141     | 141    | 141     |

## Correlations

|          |                         | CLiIVM              | KCP_IVM            | KPC_IVM |
|----------|-------------------------|---------------------|--------------------|---------|
| QTcF_48  | Correlation Coefficient | -.221 <sup>*</sup>  | -.112              | -.098   |
|          | Sig. (2-tailed)         | .010                | .197               | .258    |
|          | N                       | 134                 | 134                | 134     |
| QTcF_52  | Correlation Coefficient | -.257 <sup>**</sup> | -.181 <sup>*</sup> | -.047   |
|          | Sig. (2-tailed)         | .003                | .038               | .595    |
|          | N                       | 131                 | 131                | 131     |
| QTcF_672 | Correlation Coefficient | -.197 <sup>*</sup>  | .068               | .055    |
|          | Sig. (2-tailed)         | .032                | .465               | .552    |
|          | N                       | 118                 | 118                | 118     |
| dQTcF_52 | Correlation Coefficient | -.121               | -.100              | .060    |
|          | Sig. (2-tailed)         | .169                | .256               | .498    |
|          | N                       | 131                 | 131                | 131     |
| Cli_PPQ  | Correlation Coefficient | .239 <sup>**</sup>  | .087               | .015    |
|          | Sig. (2-tailed)         | .004                | .307               | .864    |
|          | N                       | 141                 | 141                | 141     |
| Vi_PPQ   | Correlation Coefficient | .260 <sup>**</sup>  | .022               | -.015   |
|          | Sig. (2-tailed)         | .002                | .798               | .856    |
|          | N                       | 141                 | 141                | 141     |
| k23_PPQ  | Correlation Coefficient | .030                | -.016              | -.159   |
|          | Sig. (2-tailed)         | .724                | .853               | .060    |
|          | N                       | 141                 | 141                | 141     |
| k32_PPQ  | Correlation Coefficient | -.137               | -.079              | .079    |
|          | Sig. (2-tailed)         | .106                | .354               | .351    |
|          | N                       | 141                 | 141                | 141     |
| k24_PPQ  | Correlation Coefficient | .023                | .172 <sup>*</sup>  | .105    |
|          | Sig. (2-tailed)         | .789                | .041               | .215    |
|          | N                       | 141                 | 141                | 141     |
| k42_PPQ  | Correlation Coefficient | .004                | -.037              | .040    |
|          | Sig. (2-tailed)         | .965                | .662               | .637    |
|          | N                       | 141                 | 141                | 141     |
| CAP_PPQ  | Correlation Coefficient | .109                | -.029              | -.004   |
|          | Sig. (2-tailed)         | .200                | .734               | .963    |
|          | N                       | 141                 | 141                | 141     |
| PPQAUC   | Correlation Coefficient | -.349 <sup>**</sup> | -.133              | -.037   |
|          | Sig. (2-tailed)         | .000                | .115               | .666    |
|          | N                       | 141                 | 141                | 141     |
| PPQcmax  | Correlation Coefficient | -.280 <sup>**</sup> | -.019              | .064    |
|          | Sig. (2-tailed)         | .001                | .819               | .448    |
|          | N                       | 141                 | 141                | 141     |

## Correlations

|          |                         | Va_IVM            | AUC_IVM            | Cmax_IVM          |
|----------|-------------------------|-------------------|--------------------|-------------------|
| QTcF_48  | Correlation Coefficient | .125              | .002               | -.119             |
|          | Sig. (2-tailed)         | .150              | .985               | .266              |
|          | N                       | 134               | 89                 | 89                |
| QTcF_52  | Correlation Coefficient | .126              | -.044              | -.090             |
|          | Sig. (2-tailed)         | .151              | .689               | .409              |
|          | N                       | 131               | 87                 | 87                |
| QTcF_672 | Correlation Coefficient | .145              | -.029              | -.066             |
|          | Sig. (2-tailed)         | .118              | .803               | .567              |
|          | N                       | 118               | 78                 | 78                |
| dQTcF_52 | Correlation Coefficient | .067              | .031               | -.043             |
|          | Sig. (2-tailed)         | .448              | .774               | .689              |
|          | N                       | 131               | 87                 | 87                |
| Cli_PPQ  | Correlation Coefficient | -.011             | -.145              | -.072             |
|          | Sig. (2-tailed)         | .901              | .160               | .490              |
|          | N                       | 141               | 95                 | 95                |
| Vi_PPQ   | Correlation Coefficient | -.028             | -.186              | -.194             |
|          | Sig. (2-tailed)         | .743              | .071               | .060              |
|          | N                       | 141               | 95                 | 95                |
| k23_PPQ  | Correlation Coefficient | .180 <sup>*</sup> | -.114              | -.170             |
|          | Sig. (2-tailed)         | .033              | .273               | .100              |
|          | N                       | 141               | 95                 | 95                |
| k32_PPQ  | Correlation Coefficient | .074              | .041               | .019              |
|          | Sig. (2-tailed)         | .385              | .690               | .852              |
|          | N                       | 141               | 95                 | 95                |
| k24_PPQ  | Correlation Coefficient | .027              | -.029              | .019              |
|          | Sig. (2-tailed)         | .748              | .777               | .853              |
|          | N                       | 141               | 95                 | 95                |
| k42_PPQ  | Correlation Coefficient | .057              | -.012              | -.032             |
|          | Sig. (2-tailed)         | .505              | .906               | .760              |
|          | N                       | 141               | 95                 | 95                |
| CAP_PPQ  | Correlation Coefficient | .043              | -.050              | -.129             |
|          | Sig. (2-tailed)         | .615              | .632               | .212              |
|          | N                       | 141               | 95                 | 95                |
| PPQAUC   | Correlation Coefficient | -.001             | .424 <sup>**</sup> | .186              |
|          | Sig. (2-tailed)         | .988              | .000               | .071              |
|          | N                       | 141               | 95                 | 95                |
| PPQCmax  | Correlation Coefficient | .005              | .248 <sup>*</sup>  | .207 <sup>*</sup> |
|          | Sig. (2-tailed)         | .949              | .015               | .044              |
|          | N                       | 141               | 95                 | 95                |

### Correlations

|          |                         | QTcF_0  | QTcF_48 | QTcF_52 |
|----------|-------------------------|---------|---------|---------|
| QTcF_48  | Correlation Coefficient | .617**  | 1.000   | .790**  |
|          | Sig. (2-tailed)         | .000    | .       | .000    |
|          | N                       | 134     | 134     | 131     |
| QTcF_52  | Correlation Coefficient | .669**  | .790**  | 1.000   |
|          | Sig. (2-tailed)         | .000    | .000    | .       |
|          | N                       | 131     | 131     | 131     |
| QTcF_672 | Correlation Coefficient | .686**  | .746**  | .724**  |
|          | Sig. (2-tailed)         | .000    | .000    | .000    |
|          | N                       | 118     | 114     | 112     |
| dQTcF_52 | Correlation Coefficient | -.362** | .247**  | .357**  |
|          | Sig. (2-tailed)         | .000    | .004    | .000    |
|          | N                       | 131     | 131     | 131     |
| Cli_PPQ  | Correlation Coefficient | .002    | -.037   | -.107   |
|          | Sig. (2-tailed)         | .986    | .673    | .224    |
|          | N                       | 141     | 134     | 131     |
| Vi_PPQ   | Correlation Coefficient | -.138   | -.095   | -.220*  |
|          | Sig. (2-tailed)         | .102    | .277    | .012    |
|          | N                       | 141     | 134     | 131     |
| k23_PPQ  | Correlation Coefficient | -.019   | .060    | -.072   |
|          | Sig. (2-tailed)         | .822    | .495    | .412    |
|          | N                       | 141     | 134     | 131     |
| k32_PPQ  | Correlation Coefficient | -.029   | -.157   | -.018   |
|          | Sig. (2-tailed)         | .732    | .070    | .843    |
|          | N                       | 141     | 134     | 131     |
| k24_PPQ  | Correlation Coefficient | .216*   | .102    | .103    |
|          | Sig. (2-tailed)         | .010    | .241    | .241    |
|          | N                       | 141     | 134     | 131     |
| k42_PPQ  | Correlation Coefficient | .095    | -.092   | .010    |
|          | Sig. (2-tailed)         | .265    | .292    | .911    |
|          | N                       | 141     | 134     | 131     |
| CAP_PPQ  | Correlation Coefficient | .164    | .035    | .039    |
|          | Sig. (2-tailed)         | .052    | .691    | .654    |
|          | N                       | 141     | 134     | 131     |
| PPQAUC   | Correlation Coefficient | .058    | .010    | .145    |
|          | Sig. (2-tailed)         | .491    | .910    | .099    |
|          | N                       | 141     | 134     | 131     |
| PPQcmax  | Correlation Coefficient | .167*   | .040    | .243**  |
|          | Sig. (2-tailed)         | .047    | .644    | .005    |
|          | N                       | 141     | 134     | 131     |

## Correlations

|          |                         | QTcF_672 | dQTcF_52 | ClI_PPQ |
|----------|-------------------------|----------|----------|---------|
| QTcF_48  | Correlation Coefficient | .746**   | .247**   | -.037   |
|          | Sig. (2-tailed)         | .000     | .004     | .673    |
|          | N                       | 114      | 131      | 134     |
| QTcF_52  | Correlation Coefficient | .724**   | .357**   | -.107   |
|          | Sig. (2-tailed)         | .000     | .000     | .224    |
|          | N                       | 112      | 131      | 131     |
| QTcF_672 | Correlation Coefficient | 1.000    | .099     | -.011   |
|          | Sig. (2-tailed)         | .        | .300     | .906    |
|          | N                       | 118      | 112      | 118     |
| dQTcF_52 | Correlation Coefficient | .099     | 1.000    | -.054   |
|          | Sig. (2-tailed)         | .300     | .        | .542    |
|          | N                       | 112      | 131      | 131     |
| ClI_PPQ  | Correlation Coefficient | -.011    | -.054    | 1.000   |
|          | Sig. (2-tailed)         | .906     | .542     | .       |
|          | N                       | 118      | 131      | 141     |
| Vi_PPQ   | Correlation Coefficient | -.088    | -.111    | .579**  |
|          | Sig. (2-tailed)         | .345     | .208     | .000    |
|          | N                       | 118      | 131      | 141     |
| k23_PPQ  | Correlation Coefficient | -.035    | -.037    | -.066   |
|          | Sig. (2-tailed)         | .703     | .672     | .436    |
|          | N                       | 118      | 131      | 141     |
| k32_PPQ  | Correlation Coefficient | .020     | .097     | .110    |
|          | Sig. (2-tailed)         | .833     | .268     | .194    |
|          | N                       | 118      | 131      | 141     |
| k24_PPQ  | Correlation Coefficient | .168     | -.161    | .166*   |
|          | Sig. (2-tailed)         | .069     | .066     | .048    |
|          | N                       | 118      | 131      | 141     |
| k42_PPQ  | Correlation Coefficient | -.007    | -.028    | .549**  |
|          | Sig. (2-tailed)         | .938     | .747     | .000    |
|          | N                       | 118      | 131      | 141     |
| CAP_PPQ  | Correlation Coefficient | .085     | -.142    | .264**  |
|          | Sig. (2-tailed)         | .361     | .106     | .002    |
|          | N                       | 118      | 131      | 141     |
| PPQAUC   | Correlation Coefficient | .052     | .164     | -.674** |
|          | Sig. (2-tailed)         | .576     | .062     | .000    |
|          | N                       | 118      | 131      | 141     |
| PPQCmax  | Correlation Coefficient | .190*    | .137     | -.426** |
|          | Sig. (2-tailed)         | .040     | .120     | .000    |
|          | N                       | 118      | 131      | 141     |

## Correlations

|          |                         | Vi_PPQ              | k23_PPQ             | k32_PPQ            |
|----------|-------------------------|---------------------|---------------------|--------------------|
| QTcF_48  | Correlation Coefficient | -.095               | .060                | -.157              |
|          | Sig. (2-tailed)         | .277                | .495                | .070               |
|          | N                       | 134                 | 134                 | 134                |
| QTcF_52  | Correlation Coefficient | -.220 <sup>*</sup>  | -.072               | -.018              |
|          | Sig. (2-tailed)         | .012                | .412                | .843               |
|          | N                       | 131                 | 131                 | 131                |
| QTcF_672 | Correlation Coefficient | -.088               | -.035               | .020               |
|          | Sig. (2-tailed)         | .345                | .703                | .833               |
|          | N                       | 118                 | 118                 | 118                |
| dQTcF_52 | Correlation Coefficient | -.111               | -.037               | .097               |
|          | Sig. (2-tailed)         | .208                | .672                | .268               |
|          | N                       | 131                 | 131                 | 131                |
| Cli_PPQ  | Correlation Coefficient | .579 <sup>**</sup>  | -.066               | .110               |
|          | Sig. (2-tailed)         | .000                | .436                | .194               |
|          | N                       | 141                 | 141                 | 141                |
| Vi_PPQ   | Correlation Coefficient | 1.000               | -.226 <sup>**</sup> | -.198 <sup>*</sup> |
|          | Sig. (2-tailed)         | .                   | .007                | .019               |
|          | N                       | 141                 | 141                 | 141                |
| k23_PPQ  | Correlation Coefficient | -.226 <sup>**</sup> | 1.000               | .122               |
|          | Sig. (2-tailed)         | .007                | .                   | .151               |
|          | N                       | 141                 | 141                 | 141                |
| k32_PPQ  | Correlation Coefficient | -.198 <sup>*</sup>  | .122                | 1.000              |
|          | Sig. (2-tailed)         | .019                | .151                | .                  |
|          | N                       | 141                 | 141                 | 141                |
| k24_PPQ  | Correlation Coefficient | -.161               | .203 <sup>*</sup>   | .299 <sup>**</sup> |
|          | Sig. (2-tailed)         | .057                | .016                | .000               |
|          | N                       | 141                 | 141                 | 141                |
| k42_PPQ  | Correlation Coefficient | .054                | -.016               | .621 <sup>**</sup> |
|          | Sig. (2-tailed)         | .527                | .851                | .000               |
|          | N                       | 141                 | 141                 | 141                |
| CAP_PPQ  | Correlation Coefficient | .224 <sup>**</sup>  | .024                | .015               |
|          | Sig. (2-tailed)         | .008                | .780                | .856               |
|          | N                       | 141                 | 141                 | 141                |
| PPQAUC   | Correlation Coefficient | -.797 <sup>**</sup> | .059                | .242 <sup>**</sup> |
|          | Sig. (2-tailed)         | .000                | .484                | .004               |
|          | N                       | 141                 | 141                 | 141                |
| PPQcmax  | Correlation Coefficient | -.816 <sup>**</sup> | .034                | .424 <sup>**</sup> |
|          | Sig. (2-tailed)         | .000                | .690                | .000               |
|          | N                       | 141                 | 141                 | 141                |

## Correlations

|          |                         | k24_PPQ | k42_PPQ | CAP_PPQ  |
|----------|-------------------------|---------|---------|----------|
| QTcF_48  | Correlation Coefficient | .102    | -.092   | .035     |
|          | Sig. (2-tailed)         | .241    | .292    | .691     |
|          | N                       | 134     | 134     | 134      |
| QTcF_52  | Correlation Coefficient | .103    | .010    | .039     |
|          | Sig. (2-tailed)         | .241    | .911    | .654     |
|          | N                       | 131     | 131     | 131      |
| QTcF_672 | Correlation Coefficient | .168    | -.007   | .085     |
|          | Sig. (2-tailed)         | .069    | .938    | .361     |
|          | N                       | 118     | 118     | 118      |
| dQTcF_52 | Correlation Coefficient | -.161   | -.028   | -.142    |
|          | Sig. (2-tailed)         | .066    | .747    | .106     |
|          | N                       | 131     | 131     | 131      |
| Cli_PPQ  | Correlation Coefficient | .166 *  | .549 ** | .264 **  |
|          | Sig. (2-tailed)         | .048    | .000    | .002     |
|          | N                       | 141     | 141     | 141      |
| Vi_PPQ   | Correlation Coefficient | -.161   | .054    | .224 **  |
|          | Sig. (2-tailed)         | .057    | .527    | .008     |
|          | N                       | 141     | 141     | 141      |
| k23_PPQ  | Correlation Coefficient | .203 *  | -.016   | .024     |
|          | Sig. (2-tailed)         | .016    | .851    | .780     |
|          | N                       | 141     | 141     | 141      |
| k32_PPQ  | Correlation Coefficient | .299 ** | .621 ** | .015     |
|          | Sig. (2-tailed)         | .000    | .000    | .856     |
|          | N                       | 141     | 141     | 141      |
| k24_PPQ  | Correlation Coefficient | 1.000   | .456 ** | .304 **  |
|          | Sig. (2-tailed)         | .       | .000    | .000     |
|          | N                       | 141     | 141     | 141      |
| k42_PPQ  | Correlation Coefficient | .456 ** | 1.000   | .110     |
|          | Sig. (2-tailed)         | .000    | .       | .192     |
|          | N                       | 141     | 141     | 141      |
| CAP_PPQ  | Correlation Coefficient | .304 ** | .110    | 1.000    |
|          | Sig. (2-tailed)         | .000    | .192    | .        |
|          | N                       | 141     | 141     | 141      |
| PPQAUC   | Correlation Coefficient | -.090   | -.062   | -.263 ** |
|          | Sig. (2-tailed)         | .286    | .467    | .002     |
|          | N                       | 141     | 141     | 141      |
| PPQcmax  | Correlation Coefficient | .156    | .123    | .056     |
|          | Sig. (2-tailed)         | .064    | .147    | .510     |
|          | N                       | 141     | 141     | 141      |



## Correlations

|          |                         | PPQAUC  | PPQCmax | ARM   |
|----------|-------------------------|---------|---------|-------|
| QTcF_48  | Correlation Coefficient | .010    | .040    | .007  |
|          | Sig. (2-tailed)         | .910    | .644    | .932  |
|          | N                       | 134     | 134     | 134   |
| QTcF_52  | Correlation Coefficient | .145    | .243**  | -.010 |
|          | Sig. (2-tailed)         | .099    | .005    | .912  |
|          | N                       | 131     | 131     | 131   |
| QTcF_672 | Correlation Coefficient | .052    | .190*   | .028  |
|          | Sig. (2-tailed)         | .576    | .040    | .760  |
|          | N                       | 118     | 118     | 118   |
| dQTcF_52 | Correlation Coefficient | .164    | .137    | -.034 |
|          | Sig. (2-tailed)         | .062    | .120    | .701  |
|          | N                       | 131     | 131     | 131   |
| Cli_PPQ  | Correlation Coefficient | -.674** | -.426** | .017  |
|          | Sig. (2-tailed)         | .000    | .000    | .844  |
|          | N                       | 141     | 141     | 141   |
| Vi_PPQ   | Correlation Coefficient | -.797** | -.816** | -.057 |
|          | Sig. (2-tailed)         | .000    | .000    | .498  |
|          | N                       | 141     | 141     | 141   |
| k23_PPQ  | Correlation Coefficient | .059    | .034    | -.072 |
|          | Sig. (2-tailed)         | .484    | .690    | .396  |
|          | N                       | 141     | 141     | 141   |
| k32_PPQ  | Correlation Coefficient | .242**  | .424**  | -.057 |
|          | Sig. (2-tailed)         | .004    | .000    | .504  |
|          | N                       | 141     | 141     | 141   |
| k24_PPQ  | Correlation Coefficient | -.090   | .156    | .036  |
|          | Sig. (2-tailed)         | .286    | .064    | .673  |
|          | N                       | 141     | 141     | 141   |
| k42_PPQ  | Correlation Coefficient | -.062   | .123    | .042  |
|          | Sig. (2-tailed)         | .467    | .147    | .622  |
|          | N                       | 141     | 141     | 141   |
| CAP_PPQ  | Correlation Coefficient | -.263** | .056    | .013  |
|          | Sig. (2-tailed)         | .002    | .510    | .874  |
|          | N                       | 141     | 141     | 141   |
| PPQAUC   | Correlation Coefficient | 1.000   | .780**  | .024  |
|          | Sig. (2-tailed)         | .       | .000    | .777  |
|          | N                       | 141     | 141     | 141   |
| PPQCmax  | Correlation Coefficient | .780**  | 1.000   | .029  |
|          | Sig. (2-tailed)         | .000    | .       | .732  |
|          | N                       | 141     | 141     | 141   |

### Correlations

|     |                         | sex  | age   | weight |
|-----|-------------------------|------|-------|--------|
| ARM | Correlation Coefficient | .011 | -.014 | .009   |
|     | Sig. (2-tailed)         | .901 | .869  | .917   |
|     | N                       | 141  | 141   | 141    |

### Correlations

|     |                         | height | KaIVM | ViIVM |
|-----|-------------------------|--------|-------|-------|
| ARM | Correlation Coefficient | .030   | .008  | -.104 |
|     | Sig. (2-tailed)         | .720   | .928  | .219  |
|     | N                       | 141    | 141   | 141   |

### Correlations

|     |                         | CLiIVM | KCP_IVM | KPC_IVM |
|-----|-------------------------|--------|---------|---------|
| ARM | Correlation Coefficient | -.078  | .135    | -.074   |
|     | Sig. (2-tailed)         | .359   | .112    | .383    |
|     | N                       | 141    | 141     | 141     |

### Correlations

|     |                         | Va_IVM | AUC_IVM | Cmax_IVM |
|-----|-------------------------|--------|---------|----------|
| ARM | Correlation Coefficient | -.007  | .577**  | .591**   |
|     | Sig. (2-tailed)         | .937   | .000    | .000     |
|     | N                       | 141    | 95      | 95       |

### Correlations

|     |                         | QTcF_0 | QTcF_48 | QTcF_52 |
|-----|-------------------------|--------|---------|---------|
| ARM | Correlation Coefficient | -.008  | .007    | -.010   |
|     | Sig. (2-tailed)         | .923   | .932    | .912    |
|     | N                       | 141    | 134     | 131     |

### Correlations

|     |                         | QTcF_672 | dQTcF_52 | CLi_PPQ |
|-----|-------------------------|----------|----------|---------|
| ARM | Correlation Coefficient | .028     | -.034    | .017    |
|     | Sig. (2-tailed)         | .760     | .701     | .844    |
|     | N                       | 118      | 131      | 141     |

### Correlations

|     |                         | Vi_PPQ | k23_PPQ | k32_PPQ |
|-----|-------------------------|--------|---------|---------|
| ARM | Correlation Coefficient | -.057  | -.072   | -.057   |
|     | Sig. (2-tailed)         | .498   | .396    | .504    |
|     | N                       | 141    | 141     | 141     |

### Correlations

|     |                         | k24_PPQ | k42_PPQ | CAP_PPQ |
|-----|-------------------------|---------|---------|---------|
| ARM | Correlation Coefficient | .036    | .042    | .013    |
|     | Sig. (2-tailed)         | .673    | .622    | .874    |
|     | N                       | 141     | 141     | 141     |

### Correlations

|     |                         | PPQAUC | PPQCmax | ARM   |
|-----|-------------------------|--------|---------|-------|
| ARM | Correlation Coefficient | .024   | .029    | 1.000 |
|     | Sig. (2-tailed)         | .777   | .732    | .     |
|     | N                       | 141    | 141     | 141   |

\*\* . Correlation is significant at the 0.01 level (2-tailed).

\* . Correlation is significant at the 0.05 level (2-tailed).
